# Supplementary material for: Synthesis of small yolk–shell Fe3O4@TiO2 nanoparticles with controllable thickness as recyclable photocatalysts
Source: Royal Society of Chemistry journal article supplement (doi:10.1039/c3ra47461e), 2014-01-01
Supplement: c3ra47461e.pdf [file c3ra47461e.pdf]

## Supporting Information

### Synthesis of Small Yolk-shell $\text{Fe}_3\text{O}_4@\text{TiO}_2$ Nanoparticles with Controllable Thickness as Recyclable Photocatalysts

Wankui Su,<sup>a</sup> Ting Zhang,<sup>a</sup> Lei Li,<sup>a</sup> Jun Xing,<sup>a</sup> Mingyue He,<sup>a</sup> Yijun Zhong<sup>b</sup> and Zhengquan Li<sup>\*a,b</sup>

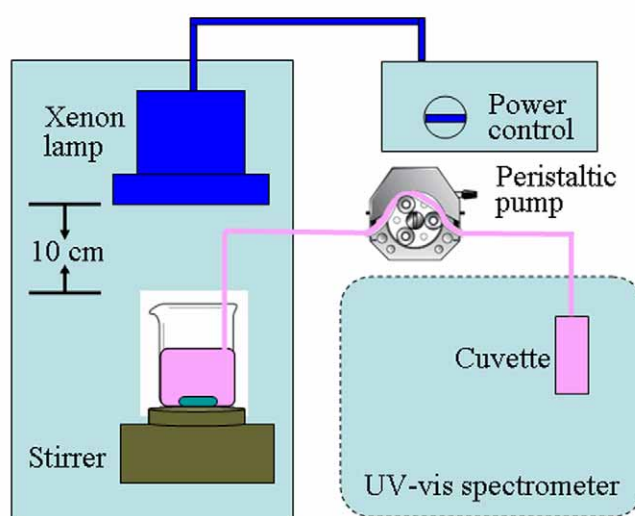

**Fig. S1** Schematic illustration of the photocatalytic experiments.

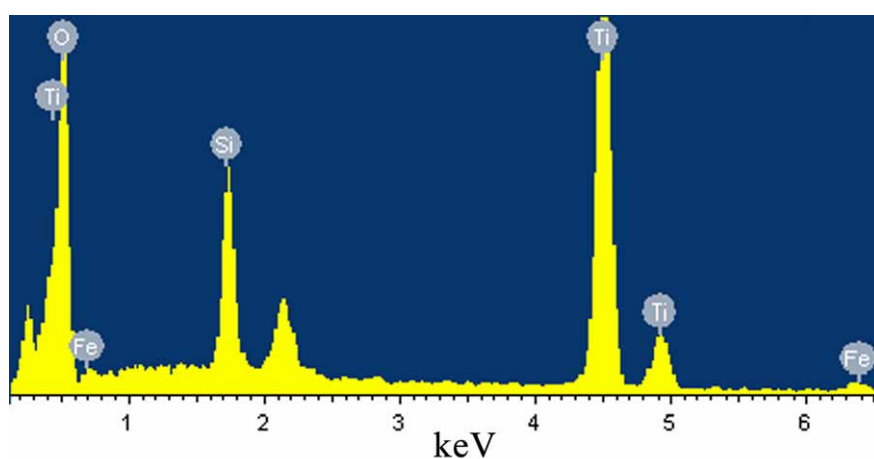

**Fig. S2** EDS data of the prepared  $\text{Fe}_3\text{O}_4@\text{TiO}_2$  yolk-shell NPs (Sample 3). The peaks without denotation are from the copper substrate used for measurement. Beside the element Fe, Ti and O, an obvious peak from Si was also found. This result suggests that not the whole  $\text{SiO}_2$  layer has been etched off.

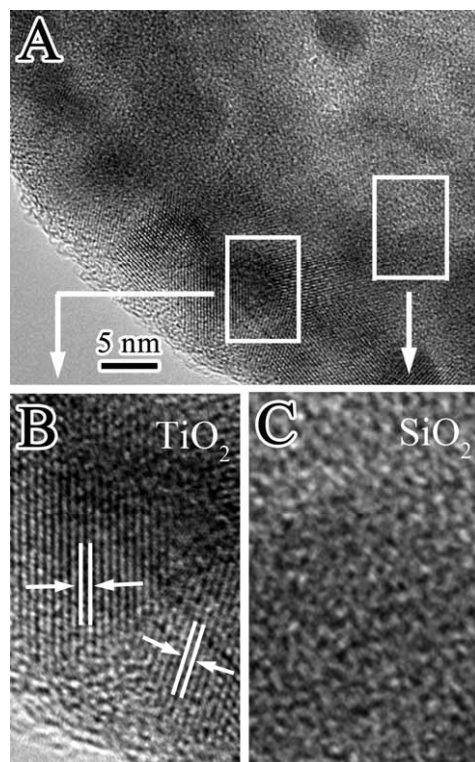

**Fig. S3** (A) High-resolution TEM image of the TiO<sub>2</sub> shell; (B) and (C) are magnified images at the surface and the inner layer, respectively. From the surface, clear lattice fringes can be observed and the distance is consistent with the (101) planes of anatase TiO<sub>2</sub> crystal, suggesting that the surface is composed of crystallized TiO<sub>2</sub> nanocrystals. In contrast, no obvious fringe is observed at the inner shell, implying that a thin amorphous SiO<sub>2</sub> layer still exist due to the incomplete etching.

| <b>Samples</b> | TiO <sub>2</sub> thickness<br>(nm) | Total size<br>(nm) | Volume of TDAA solution<br>(mL) |
|----------------|------------------------------------|--------------------|---------------------------------|
| Samples 1      | 6                                  | 31                 | 2.25                            |
| Samples 2      | 11                                 | 40                 | 4.5                             |
| Samples 3      | 19                                 | 47                 | 9                               |
| Samples 4      | 27                                 | 54                 | 18                              |

**Table S1** List of the total size and TiO<sub>2</sub> thickness of the samples prepared with different amount of TDAA solution. These results indicate that the thickness of TiO<sub>2</sub> shell can be controlled by the addition of TDAA solution.

| Samples   | Weight ratio (%) |       |       |       |
|-----------|------------------|-------|-------|-------|
|           | Fe               | O     | Si    | Ti    |
| Samples 1 | 2.06             | 51.27 | 25.71 | 20.96 |
| Samples 2 | 1.99             | 50.14 | 12.03 | 35.84 |
| Samples 3 | 1.87             | 49.88 | 8.24  | 40.01 |
| Samples 4 | 1.72             | 45.38 | 5.58  | 47.32 |

**Table S2** List of the elemental contents in different samples determined by EDS analyses.
